1 CLASSIFICATION: Biological sciences – Evolution

2 TITLE: **Global fingerprint of humans on the distribution of *Bartonella* bacteria in**  
3 **mammals**

4

5 AUTHORS: Hannah K. Frank<sup>1,2</sup> and Elizabeth A. Hadly<sup>1,3,4</sup>

6

7 AUTHOR AFFILIATIONS:

8 1. Department of Biology, 371 Serra Mall, Stanford University, Stanford, California 94305

9 2. Department of Pathology, 300 Pasteur Drive, Stanford University, Stanford, California 94305

10 3. Stanford Woods Institute for the Environment, 473 Via Ortega, Stanford, California 94305

11 4. Center for Innovation in Global Health, 300 Pasteur Drive, Stanford University, Stanford,

12 California

13

14 CORRESPONDING AUTHOR: Hannah K. Frank; 300 Pasteur Drive, Edwards R214, Stanford,

15 CA 94305; 626-221-8292; [hkfrank@stanford.edu](mailto:hkfrank@stanford.edu)

16

17 KEYWORDS: Zoonosis, spillover, Anthropocene, disease

## 18 **Abstract**

19           As humans alter habitats and move themselves and their commensal animals around the  
20 globe they change the disease risk for themselves, their commensal animals and wildlife.  
21 *Bartonella* bacteria are prevalent in many mammalian taxa, responsible for numerous human  
22 infections and presumed to be an important emerging group of zoonoses. Understanding how this  
23 genus has evolved and passed between host taxa in the past can reveal not only how current  
24 patterns were established but identify potential mechanisms for future cross-species  
25 transmission. We analyzed patterns of *Bartonella* transmission and likely sources of spillover  
26 using the largest collection of *Bartonella gltA* genotypes assembled, 860 unique genotypes of  
27 *Bartonella* globally. We provide support for the hypothesis that this pathogenic genus originated  
28 as an environmental bacterium before becoming an insect commensal and finally vertebrate  
29 pathogen. We show that rodents and domestic animals serve as the reservoirs or at least key  
30 proximate host for most *Bartonella* genotypes in humans. We also find evidence of exchange of  
31 *Bartonella* between domestic animals and wildlife and between domestic animals, likely due to  
32 increased contact between all groups. *Bartonella* is a useful infection for tracing potential  
33 zoonoses and demonstrates another major impact of humans on the planet. Care should be taken  
34 to avoid contact between humans, domestic animals and wildlife to protect the health of all.

## 36 **Introduction**

37           Human movements and actions have numerous impacts for wildlife disease (1, 2). These  
38 impacts are of concern both from a wildlife conservation standpoint (1, 2) and from a public  
39 health perspective (spillover). Over 60% of emerging infectious diseases in the world are  
40 zoonotic, meaning they are transmitted from animals to humans (3). Despite the fact that  
41 zoonosis is an important component of emerging infectious diseases, it is often difficult to trace  
42 the ecology and evolution of zoonotic pathogens (4). Most efforts to identify the source of  
43 zoonoses occur after a human has become infected. Because spillover events are rare and often  
44 infection prevalence in the reservoir species is low, it can be difficult to trace the origin of  
45 potential zoonoses. However, *Bartonella* bacteria are an exception to this pattern. This genus of  
46 bacteria has been found in numerous taxa and is usually at high prevalence (5). *Bartonella* is a  
47 blood-borne pathogen, found in many animals. It is the cause of cat scratch fever, Carrion's  
48 disease and trench fever as well as a number of incidents of endocarditis in humans and has been

49 hypothesized to be the cause of unexplained febrile illness in a number of cases (5, 6). Therefore,  
50 it is an ideal pathogen to focus on in tracing zoonotic potential as well as potential impacts on the  
51 native hosts. In this study, we construct some of the largest global phylogenies to date of  
52 *Bartonella* from both 16s rRNA genes and citrate synthase (*gltA*) to determine the evolutionary  
53 history of *Bartonella*, patterns of host switching and geographic constraint and its spillover into  
54 humans or from human commensals into wild species. The citrate synthase gene is known to  
55 give high power to discriminate between *Bartonella* strains and is one of the most commonly  
56 sequenced *Bartonella* genes (7, 8). We also examine 16S as it is the most commonly sequenced  
57 locus for metagenomics studies, though it gives low power to discriminate between *Bartonella*  
58 species (8).

59

## 60 **Results**

61 Starting with 1,618 *gltA* records, we analyzed 860 unique 277 bp sequences. In our final  
62 dataset, the most commonly sampled taxa were rodents (N = 559) and bats (N = 204), though  
63 some genotypes were found in multiple taxa so these are not strict numbers. Many nodes did not  
64 have good support so we conducted all analyses using only nodes with a posterior value of 0.7 or  
65 above. In order to test hypotheses regarding the timing of *Bartonella* cross-species transmission  
66 we created a time calibrated phylogeny using a subset of 334 sequences from which we were  
67 able to obtain a 548bp fragment of *gltA* and calibrated it at two nodes using the divergence time  
68 between hosts as the divergence time between *Bartonella* genotypes (see Materials and  
69 Methods). For this we used Costa Rican bats to calibrate the tree as their phylogenetic  
70 relationships have been well studied and there is no evidence to suggest *Bartonella* host shifts in  
71 this clade have been impacted by humans.

72

## 73 *Evolutionary history*

74 Phylogenetic hypotheses generated from a 277bp fragment of *gltA* and a 259 bp fragment  
75 of the 16s rRNA gene both support an origin for *Bartonella* in the environment and in the guts of  
76 insects (both ectoparasitic and non-ectoparasitic species; Figures 1 and 2). Twice *Bartonella* has  
77 infected mammals from these environmental samples, which are basal to the main clade of  
78 mammal-associated *Bartonella* (Figure 2), which likely invaded mammals approximately 56

79 million years ago based on our time calibrated phylogeny, though it is unclear which mammalian  
80 host is ancestral (Figure 2; Figure S1).

81

## 82 *Host and Geographic Conservation*

83 *Bartonella* are generally highly host specific with closely related genotypes found in the  
84 same order of host; the best model of evolution for *Bartonella* host order in the 860 analyzed  
85 277bp fragments was a lambda model in which lambda was 0.98, indicating near Brownian  
86 motion evolution along the phylogeny (AICc weight = 0.998; Table S1). Similarly, closely  
87 related genotypes of *Bartonella* were generally in the same geographic regions, whether  
88 analyzed by the continent from which the genotype was isolated or Old World versus New  
89 World (best model for both was a lambda transformation; continent:  $\lambda = 0.99$ , AICc weight =  
90 0.88; OW-NW:  $\lambda = 0.99$ ; AICc weight = 0.92; Tables S2 and S3).

91

## 92 *Exceptions to host specificity and limited geographic range: zoonosis and the human-domestic-* 93 *wildlife interface*

94 Despite the overall high host specificity of *Bartonella*, we observed a number of host  
95 shifts in our large phylogenetic hypothesis. Of 18 spillovers into humans (Figure 1; Table S4), 10  
96 were from rodent clades, though two of these -- *B. clarridgeiae* and *B. henselae* -- usually infect  
97 humans from domestic dogs and cats (9). In some cases, multiple strains of the same *Bartonella*  
98 species have infected humans representing separate spillovers, such as in the case of *B.*  
99 *washoensis* or the *B. vinsonii* complex which is found in both rodents and dogs (9). Two human  
100 infections appear to stem from bats, one from rabbits and another from cats (*B. koehlerae*). Four  
101 genotypes were of uncertain origin -- *B. tamiae*, a basal infectious strain that causes febrile illness  
102 in humans in Asia and likely originates in rodents (6, 10); *B. bacilliformis*, the causative agent of  
103 Carrion's disease and verruga peruana (11), a South American zoonosis and *B. ancashensis*, a  
104 causative agent of verruga peruana (12) and *B. quintana*, the causative agent of trench fever.  
105 *Bartonella quintana* has also been found in gerbils (9) and grouped with Old World rodent and  
106 bat-associated genotypes, as well as *B. koehlerae* and *B. henselae*, nested within a larger clade of  
107 Old World bat-associated *Bartonella*. (Its association with the larger clade of bat-associated  
108 *Bartonella* is only evident in the phylogenetic hypothesis based on the 548 bp *gltA* fragment.)  
109 Rodent-hosted *Bartonella* has infected carnivores nine times (mostly dogs and cats, but also

110 badgers twice), bats twice and artiodactyls (a cow ectoparasite) once. Bat-hosted *Bartonella* has  
111 infected domestic dogs and cats five times and rodents three times. Artiodactyl-associated  
112 *Bartonella* has infected a bat and a dog. We also inferred eight transfers of *Bartonella* between  
113 rodents and shrews, which are phylogenetically quite distant but presumably share the same  
114 terrestrial habitats and some of the same ectoparasite vectors.

115 Additionally, we noted a minimum of 68 instances in which monophyletic clades or  
116 single genotypes contained genotypes isolated from more than one continent/ geographic region,  
117 40 of which spanned both the Old World and New World, denoted in parentheses (Figure S2). Of  
118 the clades, 52 (31) involved genotypes found in rodents, 18 (16) involved humans, 20 (15)  
119 involved cats and dogs, 2 (1) involved domestic hoof stock, 2 (1) involved badgers, 8 (6)  
120 involved shrews, 1 (0) involved pikas and 14 (7) involved bats. Comparing each host category  
121 there may be a difference in the likelihood of group carrying global strains of *Bartonella*  
122 (Fisher's exact test,  $p = 0.1029$ ), and when we grouped humans, cats, dogs and domestic  
123 artiodactyls together as human-associated strains and bats, badgers, shrews and pikas together as  
124 wildlife-associated strains, the human-associated strains were marginally more likely to be  
125 globally distributed (Fisher's exact test,  $p = 0.054$ ). All clades known to be found on at least 5  
126 continents were found in humans (*B. clarridgeiae*, *B. henselae*, *B. quintana*, *B. vinsonii* complex  
127 and a large clade containing global rodents).

128 Human-associated strains were also, on average, due to some of the most recent host-  
129 shifting events (mean minimum divergence time = 1.6 mya) from one order to another, compared  
130 to bats (6.3 mya), carnivores (2.1 mya), shrews (1.1 mya), and rodents (3.0 mya), with the  
131 exception of a recent host switch into non-human primates at least ca. 400 kya (Figure S1). As  
132 noted above, rodents and shrews seem to be sharing similar *Bartonella* (all shrew-associated host  
133 switches are with rodents). If we exclude rodent-shrew transfers, the average host-shift time for  
134 rodents is a minimum of 4.8 mya.

135

## 136 ***Discussion***

### 137 *Bartonella as an environmental bacteria turned insect gut symbiont turned vertebrate pathogen*

138 The proliferation of studies investigating *Bartonella* in various wildlife populations  
139 allows for greater insights into the origins and evolution of *Bartonella* and its potential for  
140 spillover more than ever before. Bartonellaceae is nested within the Rhizobiales, a lineage of soil

141 bacteria that contains nitrogen-fixing root-associated members (13). In our study, *B. apis* was the  
142 most basal strain of *Bartonella*. Additionally, gut microbiome studies from a variety of insects  
143 have revealed that *Bartonella* are actually widespread across arthropods, occurring in carrion  
144 beetles, butterflies, bees, various species of ants and a wide variety of ectoparasitic species (14–  
145 20). Other studies have hypothesized that perhaps *Bartonella* may have a commensal role in the  
146 arthropods that vector it (21, 22). This led us to hypothesize that *Bartonella* originated as an  
147 environmental microbe that was picked up by arthropods in which it diversified.

148 Because most metagenomic studies of bacteria amplify the 16s rRNA gene, there is a  
149 large amount of 16s data available and also *Bartonella* can be detected in samples that would not  
150 *a priori* be hypothesized to contain *Bartonella*, such as non-hematophagous insects or  
151 environmental samples. We mined GenBank for *Bartonella* 16s sequences to test our hypothesis  
152 that *Bartonella* is an environmental bacterium that became an insect commensal before  
153 becoming a vertebrate pathogen. The 16s rRNA gene is much less powerful for discriminating  
154 *Bartonella* species than *gltA* (7) and often metagenomic studies amplify only very small  
155 fragments of the gene, making it difficult for us to resolve fine scale diversification but we were  
156 able to determine that basal strains of *Bartonella* were largely found in environmental samples  
157 and non-hematophagous insects (Figure 1). Additionally, work on *Bartonella* has shown that the  
158 evolution of a type 4 secretion system, along with selection on other invasion mechanisms (13),  
159 has been instrumental in allowing *Bartonella* to diversify and invade host cells (23, 24) while  
160 other work has shown *Bartonella* can incorporate a type 4 secretion system via lateral gene  
161 transfer when it coinfects an amoeba with *Rhizobium radiobacter* (25). Further, examinations of  
162 lateral gene transfer of metabolic genes in *Bartonella* reveals that many of these genes derive  
163 from common insect gut commensal bacteria (26). We strengthen the suggestions of these  
164 previous studies by drawing data from insect and environmental metabarcoding studies and  
165 demonstrating their basal phylogenetic position within *Bartonella*.

166

#### 167 *Bartonella spillover is predominantly from rodent and domestic animals*

168 Using the literature (9) and isolates from published sequences on GenBank, we identified  
169 18 genotypes of *Bartonella* that have been found in humans (most of which are also known to  
170 cause disease; Table S4). Of these, eight of the genotypes are most closely related to genotypes  
171 found in rodents and four are distributed in domestic animals (mostly dogs and cats) but have

172 spilled over into humans. *Bartonella vinsonii* forms a species complex that is associated with  
173 transmission to humans from both dogs (subsp. *berkhoffi*) and rodents (subsp. *arupensis*) and we  
174 inferred at least 4 separate transfers between humans and these animals based on phylogenetic  
175 relationships, however we treated these as a single spillover for the sake of simplicity.  
176 Additionally, we identified a genotype of *Bartonella* found in a febrile patient in Thailand  
177 (GQ200856) as having over 95% identity with *B. queenslandensis*, a genotype first found in  
178 Australian rodents and also found in numerous Asian rodents, suggesting a previously  
179 unappreciated rodent-human transmission. Interestingly, one *Bartonella* genotype that was  
180 recovered from a Polish forest worker (HM116785) most closely resembled genotypes found in  
181 European *Myotis*, a genus of bat, and their ectoparasites (JQ695834, JQ695839, KR822802).  
182 That most strains isolated from humans are related to domestic or peridomestic animals strongly  
183 indicates that spillover of *Bartonella* requires close contact between humans and the natural  
184 reservoirs of these infectious strains.

185         However, when examined at a broader scale, many of these genotypes lie within larger  
186 clades of genotypes found in wild animals. For example, *B. henselae*, *B. koehlerae* and *B.*  
187 *quintana* were closely related to isolates found in African and European rodent ectoparasites and  
188 an Asian bat, nested within a larger clade of Old World bat-associated *Bartonella*. Similarly, *B.*  
189 *mayotiminensis* was closely associated with genotypes of Central American bats detected in this  
190 study. This same isolate has also been found in bats in Europe (27) and most recently North  
191 America (28). This strongly suggests that bats may be an important reservoir species of  
192 potentially zoonotic *Bartonella* strains but that infrequent contact between bats and people  
193 prevents transmission. Rather most of the transmission we infer requires the transmission of  
194 *Bartonella* into a domestic or peridomestic animal, which can then transmit it to the human.  
195 Despite the noted host specificity of *Bartonella* (Table S1), the diversity of strains that infect  
196 humans and their distribution across the phylogenetic tree of *Bartonella* suggests that this  
197 bacterial genus can and will switch hosts when given the opportunity (especially when hosts are  
198 immunocompromised [29, 30]). The relative evolutionary lability of these genotypes is further  
199 underscored by the instances in the global phylogeny of genotypes being exchanged between  
200 bats and rodents (at least five times).

201         Overall, we found that rodents were responsible for more transmission of *Bartonella* into  
202 humans than any other group, followed by domestic animals. Rodents also transmitted the most

203 *Bartonella* to domestic animals and bats, though infections originating from wildlife such as bats  
204 in domestic animals are also relatively common. One potential explanation for the prominence of  
205 rodents in host switching may be the generalist tendencies in their ectoparasites. *Bartonella* is  
206 vectored by arthropods but some ectoparasites, such as blood sucking hippoboscid flies, are very  
207 highly host specific (31) potentially preventing cross-species transmission. In contrast, many  
208 rodents host fleas which can bite other taxa and have been found to host many genotypes of  
209 *Bartonella* that have originated in rodents and infected other species such as humans (e.g. 32,  
210 33). Considerations of the host specificity of the vector species may be very important for  
211 determining the risk for disease spillover and indeed public health officials recommend  
212 avoidance of potential vectors as the most important measure for prevention of bartonellosis (9).

213 It is important to note, however, the constraints on our conclusions due to available data.  
214 We only have a small fragment of *gltA* to examine across these 860 genotypes, making  
215 inferences at deep nodes uncertain. Additionally, we are limited to the animals that have been  
216 sampled which are overwhelmingly bats and rodents, as well as symptomatic humans. It is  
217 possible and highly likely that there are animal intermediates between these transmission events  
218 that are missing.

219

### 220 Human movements shape *Bartonella* diversification and infection patterns

221 Another interesting pattern that emerged when examining the tree as a whole was the  
222 impact of humans in spreading *Bartonella* strains and infections globally. A few particular  
223 species that are associated with humans, such as dogs, cats, cows and *Rattus* rats, have managed  
224 to bring their strains of *Bartonella* globally (9, 24, 34–39). Rats, in particular the genus *Rattus*,  
225 were very common in the largest clade of globally distributed rodent *Bartonella*, with  
226 representatives on nearly every continent. This clade also contains four zoonotic genotypes of  
227 *Bartonella*, as well as genotypes found in shrews, a dog and a bat ectoparasite, underscoring the  
228 important role of human commensals in spreading disease to humans and wildlife and across the  
229 globe.

230 There was a lot of uncertainty in the dating of our divergence times (in one instance two  
231 identical genotypes were inferred to be 600,000 years diverged) perhaps due to the small  
232 fragment we were able to analyze and the depth of evolutionary history we were exploring.  
233 Additionally, there are many genotypes that may have died out or have not been sampled that

234 mean even our minimum divergence date estimates are likely conservative. We cannot therefore  
235 state with certainty that humans are responsible for moving other species around, changing  
236 disease risk for themselves and wild animals. However, the fact that strains associated with  
237 humans or their domestic animals were generally more likely to be found globally, the fact that  
238 transfers between humans and domestic animals and other groups were the most recent ones, and  
239 the diverse placement of human infections across the phylogeny strongly support a role for  
240 humans changing their disease risk as they insert themselves and their associated animals into  
241 new habitats and ecosystems.

242         Such movements and increased human and domestic animal contact with one another and  
243 wild animals not only disguises geographic patterns of *Bartonella* diversification (e.g. *B.*  
244 *queenslandensis*, first described in Australia, in *Rattus norvegicus* in California [38]) but it has  
245 also led to presumably novel sharing of *Bartonella* between introduced domestic and  
246 peridomestic animals and native wildlife. For example, identical genotypes were found in a  
247 Chinese *Rattus* individual (DQ986952) and a white-footed mouse, a North American native  
248 (AY064534). If the introduced bacteria have adverse fitness consequences, this could be another  
249 human-mediated conservation concern.

250         Other potential aberrant patterns even include transmission of a *Rattus*-associated  
251 *Bartonella* into a cow ectoparasite in China (AY517723), the finding of *B. bovis* in an African  
252 bat (*E. helvum*, JN172054), a cat (AF071190) and in elk (KB915625) and sharing of *Bartonella*  
253 between Old World bats and dogs. The pet trade exacerbates this by shipping exotic animals all  
254 over the world, changing the pool of available infections for both the introduced and native  
255 species (41). Introduction of domestic species is causing sharing between these species and wild  
256 species, changing the disease risks for both.

257         Overall our findings show that *Bartonella* is a rich system for examining the impacts of  
258 humans on patterns of infectious disease spread within species and between species, across  
259 landscapes and across the globe. Phylogenetic inferences about the origin of infections should be  
260 interpreted with caution as they are heavily influenced by available data and the taxa that have  
261 been sampled. There may be many missing links between those we inferred but the hosts simply  
262 have not been sampled. Additionally, by analyzing host switching by order we largely  
263 overlooked switching between human-associated taxa and wild taxa in the same order (e.g.  
264 invasive *Rattus*- associated *Bartonella* transmission to native rodents). At least some part of the

265 noted host specificity of *Bartonella* seems to be due to ecological factors regulating exposure  
266 rather than immunological incompatibility. Given the diversity of sources of zoonotic strains,  
267 including divergent strains with similar clinical presentations, physicians and researchers should  
268 consider a broad range of potential animal hosts and screen for a wide range of *Bartonella*  
269 genotypes when investigating the source of a suspected *Bartonella* infection.

270

## 271 ***Materials and Methods***

272 In order to ascertain broader patterns of spillover and *Bartonella* transmission between  
273 species, sequences were downloaded from Genbank on 30 November 2016 using the search term  
274 “*Bartonella* gltA” and a separate search was conducted using the search term “*Bartonella* 16s” on  
275 1 February 2017. Insect microbiome studies that detected *Bartonella* were also used (14–20).  
276 *Bartonella* from Costa Rican bats in a mosaic agricultural landscape, including previously  
277 published (42) and new sequences are also incorporated in this study. Metadata were  
278 downloaded from Genbank and/or confirmed by examining the cited publication and are  
279 summarized in Supplementary File 1. In the case of data from unpublished work geography was  
280 inferred by the host range and/or title information in Genbank. The host of questing ticks was  
281 undetermined and therefore denoted as “unknown.” In some cases, genomes of *Bartonella* strains  
282 were published independently from their hosts; in this case we searched other literature to find  
283 the source of the strain. Sequences that were not in fact *Bartonella* gltA were removed manually  
284 and sequences were aligned using the Geneious alignment algorithm and refined using MUSCLE  
285 in Geneious (version 8.1.9 (43)). Sequences that were significantly redundant (or multiple  
286 sequences of the same species of *Bartonella*) were excluded to reduce the size of the resultant  
287 phylogenies. We also excluded some fragments that were too short or had lots of missing data, as  
288 well as fragments which misaligned significantly at the ends, causing us to doubt the quality of  
289 these end base calls. Alignments were manually inspected and corrected. Two alignments were  
290 produced, one of 548 bp and one of 277 bp. The first contained 334 sequences in total and the  
291 second included 860 unique sequences.

292 In order to test for patterns in host specificity and biogeography we also constructed time  
293 calibrated Bayesian phylogenies using BEAST 2 (44) for the 548bp fragment and the 277bp  
294 fragment. Alignments were split into three partitions based on the base pair’s position in the  
295 codon and run in PartitionFinder to determine the best nucleotide substitution models using AICc

296 (45). These parameters were then used to configure the parameters for the BEAST2 run. For the  
297 548 bp run, Partitionfinder determined that all three positions should be run under the same  
298 mode, a GTR+I+G+X model; for the 277bp the results were similar except that the model  
299 favored was a GTR+I+G. As empirical and maximum likelihood estimated base frequencies  
300 usually have little impact on the phylogeny we used observed base frequencies for both sets of  
301 nucleotides (45).

302 We tested three different models for the phylogenetic hypothesis based on the 548bp  
303 fragment. All three analyses were run with a gamma site model with empirical base frequencies,  
304 an estimated proportion of invariant sites and all nucleotide transition/transversion frequencies  
305 except the CT transition rate estimated. The gamma shape prior was set to an exponential  
306 distribution with a mean of 1; the proportion of invariant sites was set to a uniform distribution  
307 between 0 and 1; all nucleotide substitution rates were set to a gamma distribution with an alpha  
308 of 2 and a beta of 0.5 or 0.25 for transitions and transversions respectively. In all cases  
309 *Bartonella* was constrained to be monophyletic with *Brucella melitensis* as an outgroup. The first  
310 model tested was a strict clock model with a constant population size coalescent model with  
311 vague priors as has been used for previous phylogenetic analyses of *Bartonella* (35, 46) with the  
312 population size prior set to a 1/X distribution. The second was a birth death model run with a  
313 log-normal distributed relaxed molecular clock. The birth rate and relaxed clock mean priors  
314 were set to a uniform distribution between 0 and infinity; the relaxed clock standard deviation  
315 priors was set to an exponential distribution with a mean of 1; the death rate prior was set to a  
316 uniform distribution between 0 and 1. The prior distribution on the divergence date between  
317 *Brucella melitensis* and *Bartonella*, the divergence between *Bartonella clarridgeae* and  
318 *Bartonella rochalimae*, *Bartonella coopersplainensis* and *Bartonella rattaaustraliani*, *Bartonella*  
319 *florencae* and *Bartonella birtlesii* were each a normal distribution with a means of 507 mya, 30.8  
320 mya, 82 mya and 57 mya respectively based on previous estimates (47, 48). As we had no prior  
321 information about uncertainty of these estimates, we used a standard deviation of 1 my. When  
322 setting calibration nodes we only used clades that were well supported and monophyletic in prior  
323 analyses of the data regardless of clock model.

324 The third was identical to the second except that the following calibrations were used: the  
325 node at the base of a clade of phyllostomid bat-associated *Bartonella* containing genotypes from  
326 three subfamilies (Stenodermatinae, Caroliinae and Glossophaginae) was estimated to have

327 occurred at the divergence of these three subfamilies and was calibrated with a normal  
328 distribution with a mean of 24 mya and a standard deviation of 3.76 my based on previous  
329 estimates (49–62) collated in TimeTree (48). A nested clade of *Artibeus lituratus* and *Artibeus*  
330 *watsoni*-associated *Bartonella* was estimated to have evolved at their divergence and the prior  
331 distribution was estimated with a normal distribution with a mean of 8.5mya (SD = 2.73) based  
332 on previous estimates (49–51, 60, 63, 64) collated in TimeTree (48). We used these clades as  
333 calibration points as they were strongly supported in all three models, were nested within other  
334 Central American bat associated strains and therefore unlikely to have been impacted by human  
335 influence and showed evidence of supporting a similar rate of evolution.

336 For the 277bp tree we also ran PartitionFinder2 (45) which determined that all three  
337 positions should be run under the same model, GTR+I+G so we ran our simulations with a GTR  
338 distribution, an estimated proportion of invariant sites and a gamma distribution of rates. We  
339 tested two models, a strict clock, constant population size coalescent model as described in the  
340 first model for the 548bp alignment and a birth death model with a relaxed log normal clock as  
341 described in the second model for the 548bp alignment. In both models we constrained *Brucella*  
342 *melitensis* to be an outgroup but no other calibrations were included. All *gltA* model were run for  
343  $2.5 \times 10^7$  generations and sampled every 50,000 generations.

344 All *gltA* models converged with all parameters showing an ESS over 200, except a few  
345 parameters in the second 548bp model which all showed an ESS over 110. The three models for  
346 the 548bp alignment were compared using AICM of the likelihood (65) implemented through  
347 Tracer as model comparison using path sampling was not practical. For the 548bp alignment the  
348 best model was the third – a relaxed log normal clock calibrated with host divergence dates  
349 ( $dAICM_{1st} = 331.9$ ,  $dAICM_{2nd} = 21.2$ ). For the 277bp alignment a strict clock was favored over a  
350 relaxed clock ( $dAICM = 153.5$ ). Maximum clade credibility trees were produced using  
351 TreeAnnotator, mean heights and a burn in of 10%.

352 In order to understand the evolutionary origin of *Bartonella* we constructed a phylogeny  
353 using sequences from the 16s rRNA gene. All 450 sequences were aligned and trimmed to the  
354 same length (259 bp) in Geneious (version 8.1.9; [43]). We constructed a phylogenetic  
355 hypothesis in BEAST2 using a strict clock and a birth death model with vague priors as  
356 described in the birth death models for the *gltA* genes with *Rhizobium leguminosarum* as an  
357 outgroup. The model was run for  $10^7$  generations; most ESS were above 300, though the birth

358 rate and death rate ESS were roughly 100. As we were not concerned with speciation dynamics  
359 but rather broad topology, we consider this hypothesis to be sufficiently sampled.

360 This 277 bp *gltA* MCC tree was used in an analysis of host specificity and geographic  
361 conservation between related *Bartonella* species. Using the fitDiscrete function in geiger (66),  
362 four models of discrete character evolution were fit -- one using a lambda transformation, one  
363 using a white noise transformation, one using an early burst transformation and one using no  
364 transformation to model the evolution of host order (with strains isolated from ectoparasites  
365 assigned to the ectoparasite's host) and broad geographic region of isolation both by continent  
366 (all except Antarctica) and by Old World versus New World. Fit of the models was assessed  
367 using AICc weights and log-likelihoods.

368 Host switches and sharing of clades between geographic regions was assessed by  
369 manually examining the MCC phylogenetic hypothesis based on a 277bp fragment of *gltA*, by  
370 examining the location of Genbank records with identical genotypes and by searching the  
371 literature for the distribution of named *Bartonella* species. A host switch or geographic shift was  
372 inferred so as to capture the minimum number of shifts with posterior support of at least 0.7.

373 All alignments and metadata are available in the supporting information.

374

### 375 ***Acknowledgments***

376 We thank C. Mendenhall, F. Oviedo Brenes, R. Zahawi, W. Figueroa, R. Figueroa, J.  
377 Figueroa, Y. Lloria, S. Judson, H. Mao, dozens of Costa Rican landowners, the Organization for  
378 Tropical Studies, the Las Cruces Biological Station, and especially J. O'Marr for help with  
379 collection of data collection on Costa Rican bat-associated *Bartonella* and Krishna Roskin with  
380 obtaining data from Genbank. Additional thanks to Scott Boyd, the Hadly lab, the Boyd lab and  
381 Jonathan Flanders for useful comments. This work was graciously funded by the Stanford  
382 Woods Institute for the Environment Environmental Ventures Program. HKF was supported by a  
383 Bing-Mooney Fellowship in Environmental Science and Conservation and a Stanford Center for  
384 Computational, Evolutionary and Human Genomics Postdoctoral Fellowship. Research was  
385 approved by the Stanford University Administrative Panel on Laboratory Animal Care (protocol  
386 26920) and conducted under the appropriate Costa Rican permits (RT-044-2015-OT-  
387 CONAGEBIO, RT-042-2015-OT-CONAGEBIO, 121-2012-SINAC, RT-019-2013-OT-  
388 CONAGEBIO, 226-2012-SINAC).

389

390 **References:**

- 391 1. Warnecke L, et al. (2012) Inoculation of bats with European *Geomyces destructans*  
392 supports the novel pathogen hypothesis for the origin of white-nose syndrome. *Proc Natl*  
393 *Acad Sci* 109:6999–7003.
- 394 2. Lips KR, et al. (2006) Emerging infectious disease and the loss of biodiversity in a  
395 Neotropical amphibian community. *Proc Natl Acad Sci U S A* 103(9):3165–70.
- 396 3. Jones KE, et al. (2008) Global trends in emerging infectious diseases. *Nature* 451:990–  
397 993.
- 398 4. Lo Iacono G, et al. (2016) A Unified Framework for the Infection Dynamics of Zoonotic  
399 Spillover and Spread. *PLoS Negl Trop Dis* 10(9):e0004957.
- 400 5. Breitschwerdt EB, Maggi RG, Chomel BB, Lappin MR (2010) Bartonellosis: An  
401 emerging infectious disease of zoonotic importance to animals and human beings. *J Vet*  
402 *Emerg Crit Care* 20(1):8–30.
- 403 6. Kosoy M, et al. (2010) Identification of Bartonella infections in febrile human patients  
404 from Thailand and their potential animal reservoirs. *Am J Trop Med Hyg* 82(6):1140–  
405 1145.
- 406 7. La Scola B, Zeaiter Z, Khamis A, Raoult D (2003) Gene-sequence-based criteria for  
407 species definition in bacteriology: the Bartonella paradigm. *Trends Microbiol* 11(7):318–  
408 321.
- 409 8. Kosoy M, McKee C, Albayrak L, Fofanov Y (2017) Genotyping of Bartonella bacteria  
410 and their animal hosts: current status and perspectives. *Parasitology*:1–20.
- 411 9. Breitschwerdt EB (2017) Bartonellosis, One Health and all creatures great and small. *Vet*  
412 *Dermatol* 28(1):96-e21.
- 413 10. Kosoy M, et al. (2008) Bartonella tamiae sp. nov., a newly recognized pathogen isolated  
414 from three human patients from Thailand. *J Clin Microbiol* 46(2):772–775.
- 415 11. Breitschwerdt EB (2014) Bartonellosis: One Health perspectives for an emerging  
416 infectious disease. *ILAR J* 55(1):46–58.
- 417 12. Mullins KE, et al. (2013) Molecular typing of “Candidatus bartonella ancashi,” A new  
418 human pathogen causing Verruga Peruana. *J Clin Microbiol* 51(11):3865–3868.
- 419 13. Heavner ME, Qiu WG, Cheng HP (2015) Phylogenetic co-occurrence of ExoR, ExoS, and

- 420 ChvI, components of the RSI bacterial invasion switch, suggests a key adaptive  
421 mechanism regulating the transition between free-living and host-invading phases in  
422 rhizobiales. *PLoS One* 10(8):1–22.
- 423 14. Kautz S, Rubin BER, Russell JA, Moreau CS (2013) Surveying the microbiome of ants:  
424 Comparing 454 pyrosequencing with traditional methods to uncover bacterial diversity.  
425 *Appl Environ Microbiol* 79(2):525–534.
- 426 15. Kopeck J, Nesvorn M, Hubert J (2014) Bartonella-like bacteria carried by domestic mite  
427 species. *Exp Appl Acarol* 64(1):21–32.
- 428 16. Jones RT, McCormick KF, Martin AP (2008) Bacterial communities of Bartonella-  
429 positive fleas: Diversity and community assembly patterns. *Appl Environ Microbiol*  
430 74(5):1667–1670.
- 431 17. Laroche M, Berenger J-M, Mediannikov O, Raoult D, Parola P (2017) Detection of a  
432 Potential New Bartonella Species “Candidatus Bartonella rondoniensis” in Human Biting  
433 Kissing Bugs (Reduviidae; Triatominae). *PLoS Negl Trop Dis* 11(1):e0005297.
- 434 18. Kešnerová L, Moritz R, Engel P (2016) Bartonella apis sp. nov., a honey bee gut symbiont  
435 of the class Alphaproteobacteria. *Int J Syst Evol Microbiol* 66(1):414–421.
- 436 19. Kaltenpoth M, Steiger S (2014) Unearthing carrion beetles’ microbiome: Characterization  
437 of bacterial and fungal hindgut communities across the Silphidae. *Mol Ecol* 23(6):1251–  
438 1267.
- 439 20. Kakumanu ML, Reeves AM, Anderson TD, Rodrigues RR, Williams MA (2016) Honey  
440 bee gut microbiome is altered by in-hive pesticide exposures. *Front Microbiol* 7:1255.
- 441 21. Morse SF, et al. (2012) Global distribution and genetic diversity of Bartonella in bat flies  
442 (Hippoboscoidea, Streblidae, Nycteribiidae). *Infect Genet Evol* 12(8):1717–1723.
- 443 22. Chomel BB, et al. (2009) Ecological fitness and strategies of adaptation of Bartonella  
444 species to their hosts and vectors. *Vet Res* 40(2):29.
- 445 23. Engel P, et al. (2011) Parallel evolution of a type IV secretion system in radiating lineages  
446 of the host-restricted bacterial pathogen Bartonella. *PLoS Genet* 7(2):e1001296.
- 447 24. Guy L, et al. (2013) A Gene Transfer Agent and a Dynamic Repertoire of Secretion  
448 Systems Hold the Keys to the Explosive Radiation of the Emerging Pathogen Bartonella.  
449 *PLoS Genet* 9(3):e1003393.
- 450 25. Saisongkorh W, Robert C, La Scola B, Raoult D, Rolain JM (2010) Evidence of transfer

- 451 by conjugation of type IV secretion system genes between *Bartonella* species and  
452 *Rhizobium radiobacter* in amoeba. *PLoS One* 5(9):1–14.
- 453 26. Zhu Q, Kosoy M, Olival KJ, Dittmar K (2014) Horizontal transfers and gene losses in the  
454 phospholipid pathway of *Bartonella* reveal clues about early ecological niches. *Genome*  
455 *Biol Evol* 8(6):2156–2169.
- 456 27. Veikkolainen V, Vesterinen EJ, Lilley TM, Pulliainen AT (2014) Bats as reservoir hosts  
457 of human bacterial pathogen, *Bartonella mayotimonensis*. *Emerg Infect Dis* 20(6):960–  
458 967.
- 459 28. Lilley TM, et al. (2017) Molecular Detection of *Candidatus Bartonella mayotimonensis* in  
460 North American Bats. *Vector-Borne Zoonotic Dis* 17(4):243–246.
- 461 29. Clarridge JE, et al. (1995) Strategy to detect and identify *Bartonella* species in routine  
462 clinical laboratory yields *Bartonella henselae* from human immunodeficiency virus-  
463 positive patient and unique *Bartonella* strain from his cat. *J Clin Microbiol* 33(8):2107–  
464 2113.
- 465 30. Oksi J, et al. (2013) Cat scratch disease caused by *Bartonella grahamii* in an  
466 immunocompromised patient. *J Clin Microbiol* 51(8):2781–2784.
- 467 31. Dick C, Patterson B (2006) Bat flies: Obligate ectoparasites of bats. *Micromammals and*  
468 *Macroparasites: From Evolutionary Ecology to Management*, eds Morand S, Krasnov B,  
469 Poulin R (Springer-Verlag Publishing), pp 179–194.
- 470 32. Abbot P, Aviles AE, Eller L, Durden LA (2007) Mixed infections, cryptic diversity, and  
471 vector-borne pathogens: Evidence from *Polygenis* fleas and *Bartonella* species. *Appl*  
472 *Environ Microbiol* 73(19):6045–6052.
- 473 33. Frye MJ, et al. (2015) Preliminary survey of ectoparasites and associated pathogens from  
474 Norway rats in New York City. *J Med Entomol* 52(2):253–259.
- 475 34. Ellis BA, et al. (1999) Rats of the genus *Rattus* are reservoir hosts for pathogenic  
476 *Bartonella* species: an Old World origin for a New World disease? *J Infect Dis*  
477 180(1):220–224.
- 478 35. Hayman DTS, McDonald KD, Kosoy MY (2013) Evolutionary history of rat-borne  
479 *Bartonella*: The importance of commensal rats in the dissemination of bacterial infections  
480 globally. *Ecol Evol* 3(10):3195–3203.
- 481 36. Rudoler N, et al. (2014) First description of *Bartonella bovis* in cattle herds in Israel. *Vet*

- 482 *Microbiol* 173(1–2):110–117.
- 483 37. Cherry NA, Maggi RG, Cannedy AL, Breitschwerdt EB (2009) PCR detection of  
484 *Bartonella bovis* and *Bartonella henselae* in the blood of beef cattle. *Vet Microbiol* 135(3–  
485 4):308–312.
- 486 38. Kho K-L, Koh F-X, Jaafar T, Nizam QNH, Tay S-T (2015) Prevalence and molecular  
487 heterogeneity of *Bartonella bovis* in cattle and *Haemaphysalis bispinosa* ticks in  
488 Peninsular Malaysia. *BMC Vet Res* 11(1):153.
- 489 39. Dahmani M, et al. (2017) *Bartonella bovis* and *Candidatus Bartonella davousti* in cattle  
490 from Senegal. *Comp Immunol Microbiol Infect Dis* 50:63–69.
- 491 40. Gundi VAKB, Billeter SA, Rood MP, Kosoy MY (2012) *Bartonella* spp. in rats and  
492 *Zoonoses*, Los Angeles, California, USA. *Emerg Infect Dis* 18(4):631–633.
- 493 41. Inoue K, et al. (2009) Exotic small mammals as potential reservoirs of zoonotic *Bartonella*  
494 spp. *Emerg Infect Dis* 15(4):526–532.
- 495 42. Judson SD, Frank HK, Hadly EA (2015) *Bartonellae* are Prevalent and Diverse in Costa  
496 Rican Bats and Bat Flies. *Zoonoses Public Health* 62:609–617.
- 497 43. Kearse M, et al. (2012) Geneious Basic: an integrated and extendable desktop software  
498 platform for the organization and analysis of sequence data. *Bioinformatics* 28(12):1647–  
499 9.
- 500 44. Bouckaert R, et al. (2014) BEAST 2: A Software Platform for Bayesian Evolutionary  
501 Analysis. *PLoS Comput Biol* 10(4):e1003537.
- 502 45. Lanfear R, Frandsen PB, Wright AM, Senfeld T, Calcott B (2017) PartitionFinder 2: New  
503 Methods for Selecting Partitioned Models of Evolution for Molecular and Morphological  
504 Phylogenetic Analyses. *Mol Biol Evol* 34:772–773.
- 505 46. McKee CD, Hayman DTS, Kosoy MY, Webb CT (2016) Phylogenetic and geographic  
506 patterns of *Bartonella* host shifts among bat species. *Infect Genet Evol* 44:382–394.
- 507 47. Marin J, Battistuzzi FU, Brown A, Hedges S (2017) The Timetree of Prokaryotes: New  
508 Insights into Their Evolution and Speciation. *Mol Biol Evol* 34(2):437–446.
- 509 48. Kumar S, Stecher G, Suleski M, Hedges SB (2017) TimeTree: A Resource for Timelines,  
510 Timetrees, and Divergence Times. *Mol Biol Evol* 34(7):1812–1819.
- 511 49. Rojas D, Warsi O, Dávalos L (2016) Bats (Chiroptera: Noctilionoidea) challenge recent  
512 origin of neotropical diversity. *Syst Biol* 65(3):432–448.

- 513 50. Shi JJ, Rabosky DL (2015) Speciation dynamics during the global radiation of extant bats.  
514 *Evolution (N Y)* 69(6):1528–1545.
- 515 51. Dumont ER, et al. (2014) Selection for mechanical advantage underlies multiple cranial  
516 optima in new world leaf-nosed bats. *Evolution (N Y)* 68(5):1436–1449.
- 517 52. Yu W, Wu Y, Yang G (2014) Early diversification trend and Asian origin for extent bat  
518 lineages. *J Evol Biol* 27(10):2204–18.
- 519 53. Davies KTJ, Bates PJJ, Maryanto I, Cotton JA, Rossiter SJ (2013) The Evolution of Bat  
520 Vestibular Systems in the Face of Potential Antagonistic Selection Pressures for Flight  
521 and Echolocation. *PLoS One* 8(4). doi:10.1371/journal.pone.0061998.
- 522 54. Rojas D, Vale Á, Ferrero V, Navarro L (2012) The role of frugivory in the diversification  
523 of bats in the Neotropics. *J Biogeogr* 39(11):1948–1960.
- 524 55. Scott JE, Lack JB, Ravosa MJ (2012) On the reversibility of mandibular symphyseal  
525 fusion. *Evolution (N Y)* 66(9):2940–2952.
- 526 56. Baker RJ, Bininda-Emonds ORP, Mantilla-Meluk H, Porter CA, Bussche RA Van Den  
527 (2012) Molecular timescale of diversification of feeding strategy and morphology in New  
528 World leaf-nosed bats (Phyllostomidae): a phylogenetic perspective. *Evol Hist bats Foss*  
529 *Mol Morphol* (December 2015):385–409.
- 530 57. Rojas D, Vale A, Ferrero V, Navarro L (2011) When did plants become important to leaf-  
531 nosed bats? Diversification of feeding habits in the family Phyllostomidae. *Mol Ecol*  
532 20(10):2217–28.
- 533 58. Lack JB, Van Den Bussche RA (2010) Identifying the confounding factors in resolving  
534 phylogenetic relationships in Vespertilionidae. *J Mammal* 91(6):1435–1448.
- 535 59. Gray P, Mammalia C, Datzmann T, Helversen O Von, Mayer F (2010) Evolution of  
536 nectarivory in phyllostomid bats. *BMC Evol Biol* 10(1):2–14.
- 537 60. Fritz SA, Bininda-Emonds ORP, Purvis A (2009) Geographical variation in predictors of  
538 mammalian extinction risk: Big is bad, but only in the tropics. *Ecol Lett* 12(6):538–549.
- 539 61. Miller-Butterworth CM, et al. (2007) A family matter: Conclusive resolution of the  
540 taxonomic position of the long-fingered bats, *Miniopterus*. *Mol Biol Evol* 24(7):1553–  
541 1561.
- 542 62. Teeling EC, et al. (2005) A molecular phylogeny for bats illuminates biogeography and  
543 the fossil record. *Science* 307(5709):580–4.

- 544 63. Larsen PA, Marchan-Rivadeneira MR, Baker RJ (2010) Natural hybridization generates  
545 mammalian lineage with species characteristics. *Proc Natl Acad Sci* 107(25):11447–  
546 11452.
- 547 64. Redondo R a F, Brina LPS, Silva RF, Ditchfield AD, Santos FR (2008) Molecular  
548 systematics of the genus *Artibeus* (Chiroptera: Phyllostomidae). *Mol Phylogenet Evol*  
549 49(1):44–58.
- 550 65. Baele G, et al. (2012) Improving the accuracy of demographic and molecular clock model  
551 comparison while accommodating phylogenetic uncertainty. *Mol Biol Evol* 29(9):2157–  
552 2167.
- 553 66. Harmon LJ, Weir JT, Brock CD, Glor RE, Challenger W (2008) GEIGER: Investigating  
554 evolutionary radiations. *Bioinformatics* 24(1):129–131.

555  
556 **Figure captions:**

557  
558 **Figure 1: Bayesian phylogenetic hypothesis of *Bartonella* genotypes based on a 259bp**  
559 **fragment of 16s rRNA gene.**

560 Ectoparasites and their vertebrate hosts are colored brown; environmental sequences are green;  
561 non-ectoparasitic arthropods are colored purple. Scale bar indicates substitutions per site.

562  
563 **Figure 2: Bayesian phylogenetic hypothesis of *Bartonella* genotypes based on a 277 bp**  
564 **fragment *gltA***

565 Tip labels and branches have been colored according to the taxa in which they were identified  
566 with ectoparasites colored according to their host and collapsed to highlight specific patterns.

- Posterior  $\geq 0.9$
- $0.7 \leq$  Posterior  $< 0.9$
- Environmental
- Vertebrates and ectoparasites
- Non-parasitic arthropods



0.01



bioRxiv preprint doi: <https://doi.org/10.1101/000000>; this version posted January 17, 2016. The copyright holder for this preprint (which was not certified by peer review) is the author/funder. All rights reserved. No reuse allowed without permission.
